# Supplementary material for: Transcriptome Sequencing Reveals the Mechanism behind Chemically Induced Oral Mucositis in a 3D Cell Culture Model
Source: MDPI journal article supplement (doi:10.3390/ijms24055058), 2023-03-06
Supplement: s1 [file s1]

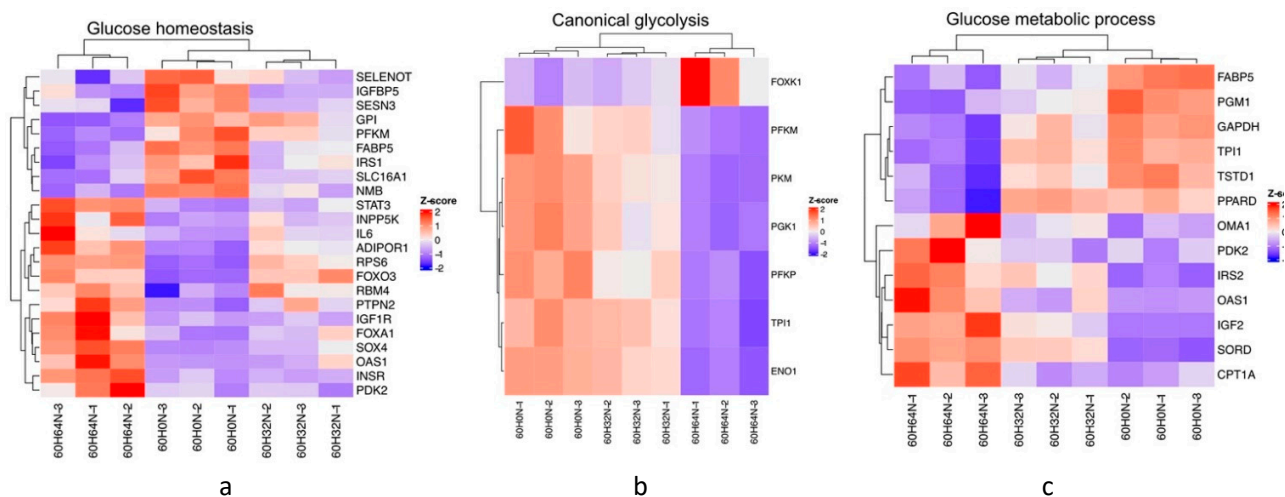

Supplementary Figure S2

Heatmap illustrating RNA-Seq differential expression for genes associated with glucose homeostasis, canonical glycolysis, and glucose metabolic process.
